# Supplementary material for: A Piezo1/KLF15/IL-6 axis mediates immobilization-induced muscle atrophy
Source: PubMed Central journal article supplement (PMC9159676; doi:10.1172/jci154611), 2022-05-16
Supplement: jci-132-154611-s008.pdf [file jci-132-154611-s008.pdf]

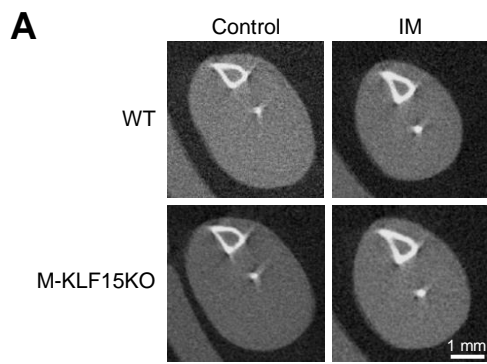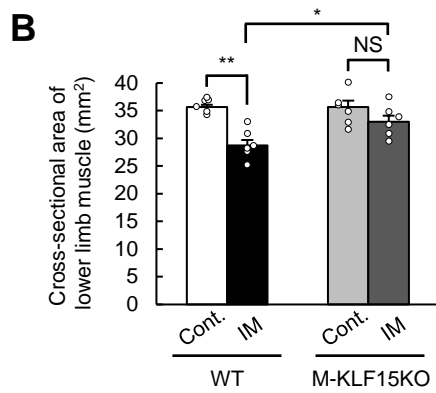

**Supplemental Figure 1. Immobilization does not induce muscle atrophy in M-KLF15KO mice.** Representative CT images (**A**) and quantitation of the cross-sectional area (**B**) of lower limb muscle for WT or M-KLF15KO mice subjected to cast immobilization for 3 days or for corresponding control mice ( $n = 6$  mice) are shown. Scale bar, 1 mm. Quantitative data are means  $\pm$  SEM. \* $P < 0.05$ , \*\* $P < 0.01$ , NS (two-way ANOVA with Bonferroni's post hoc test).

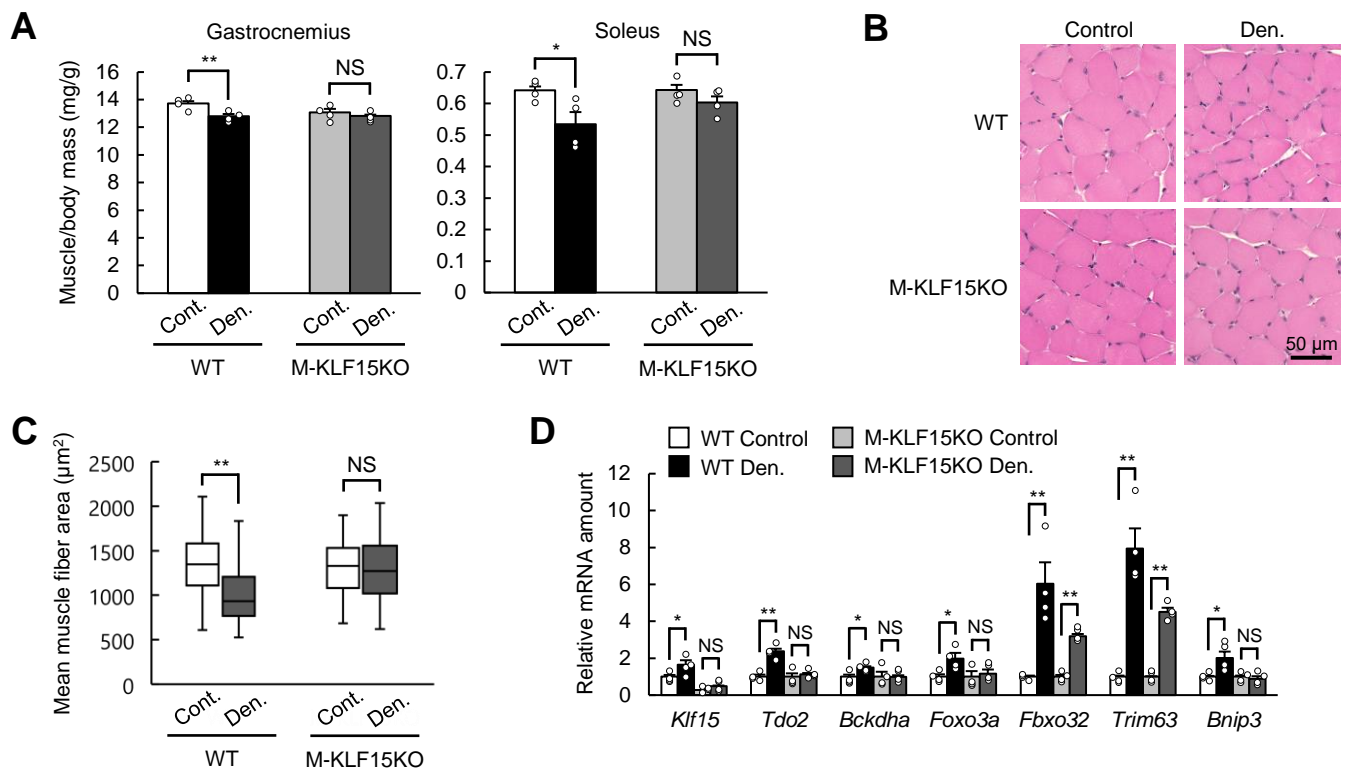

**Supplemental Figure 2. Denervation-induced muscle atrophy is prevented in M-KLF15KO mice.** Ratio of muscle mass to body mass (**A**), histological determination of muscle fiber area in soleus (**B**, **C**), and atrophy-related gene expression in gastrocnemius (**D**) are shown for WT or M-KLF15KO mice subjected to bilateral hind limb denervation (Den.) 2 days previously or for corresponding control mice ( $n = 4$  mice). Scale bar in **B**, 50  $\mu\text{m}$ . The area of 800 fibers pooled from four mice was measured for each condition in **C**. Quantitative data are means  $\pm$  SEM (**A**, **D**) or medians (**C**). \* $P < 0.05$ , \*\* $P < 0.01$ , NS (two-way ANOVA with Bonferroni's post hoc test).

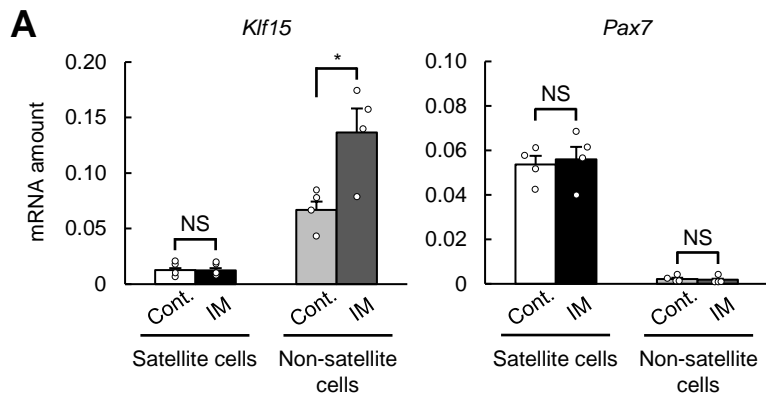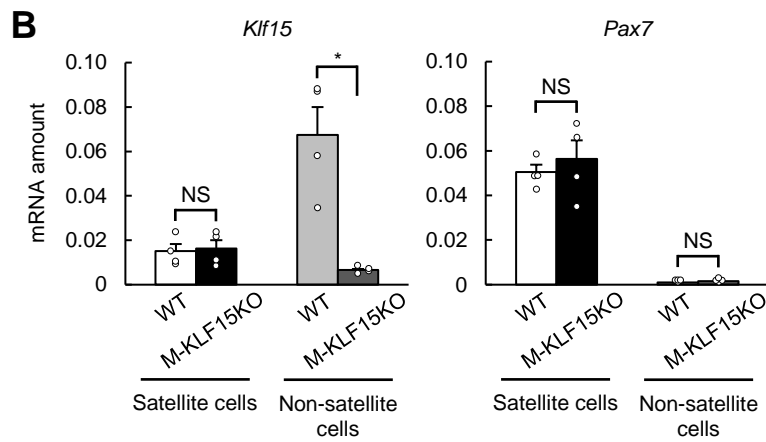

**Supplemental Figure 3. Expression of *Klf15* in the satellite cell and the non-satellite cell fractions of immobilized mice or M-KLF15KO mice. A, B,** Quantitative RT-PCR analysis of *Klf15* and *Pax7* mRNAs in the satellite cell and the non-satellite cell fractions of control or cast-immobilized mice ( $n = 4$  mice) (**A**) or of WT or M-KLF15KO mice ( $n = 4$  mice) (**B**). All quantitative data are means  $\pm$  SEM. \* $P < 0.05$ , NS (two-way ANOVA with Bonferroni's post hoc test).

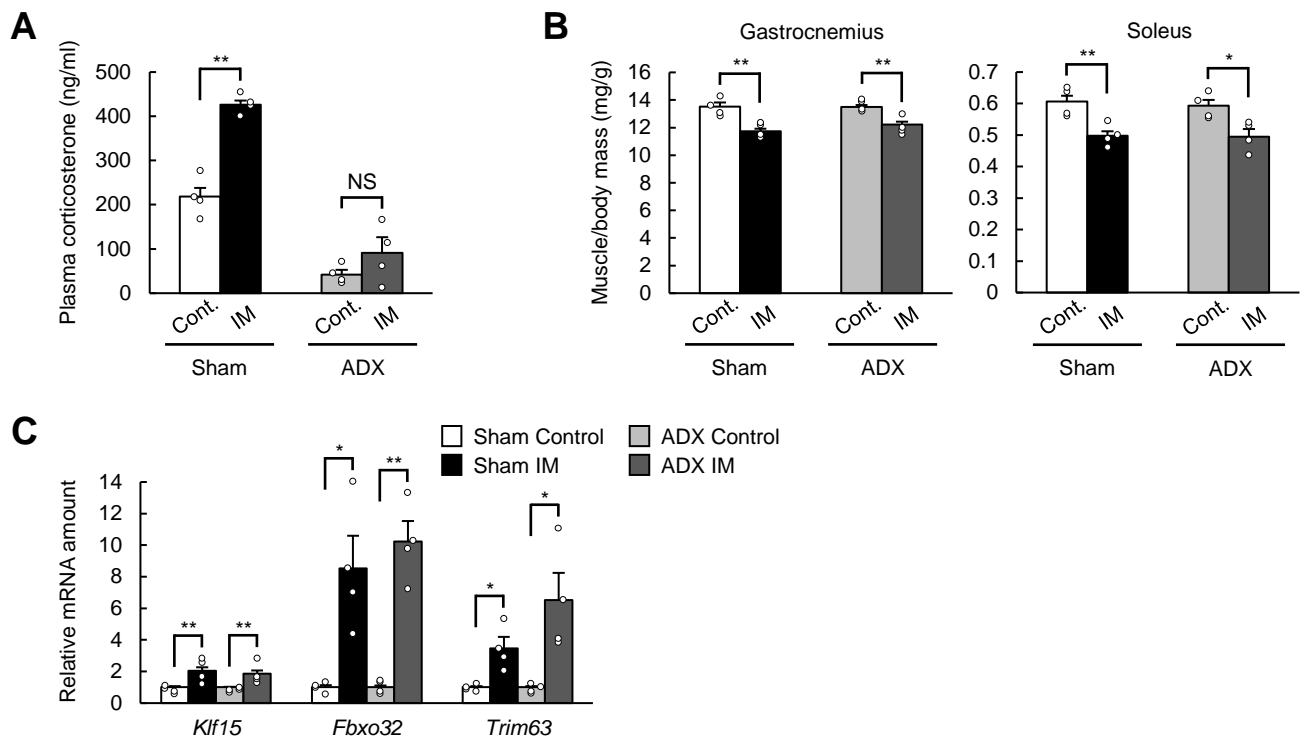

**Supplemental Figure 4. Effect of adrenalectomy on immobilization-induced muscle atrophy.** The plasma corticosterone level (A), the ratio of muscle mass to body mass (B), and atrophy-related gene expression in gastrocnemius (C) are shown for adrenalectomized (ADX) or sham-operated mice subjected to cast immobilization for 3 days or for corresponding control animals ( $n = 4$  mice). All quantitative data are means  $\pm$  SEM. \* $P < 0.05$ , \*\* $P < 0.01$ , NS (two-way ANOVA with Bonferroni's post hoc test).



related gene expression in gastrocnemius ( $n = 6$  mice) (**C**) are shown for control mice subjected to intraperitoneal injection of neutralizing antibodies to IL-6 (0.1 mg/body) or control IgG. **D, E**, Ratio of muscle mass to body mass ( $n = 5$  mice) (**D**) and atrophy-related gene expression in gastrocnemius ( $n = 5$  mice) (**E**) are shown for control or cast-immobilized M-KLF15KO mice subjected to intraperitoneal injection of neutralizing antibodies to IL-6 (0.1 mg/body) or control IgG at the onset of limb immobilization. All quantitative data are means  $\pm$  SEM. \* $P < 0.05$ , \*\* $P < 0.01$ , NS by the unpaired  $t$  test (**A–C**) or two-way ANOVA with Bonferroni's post hoc test (**D, E**).

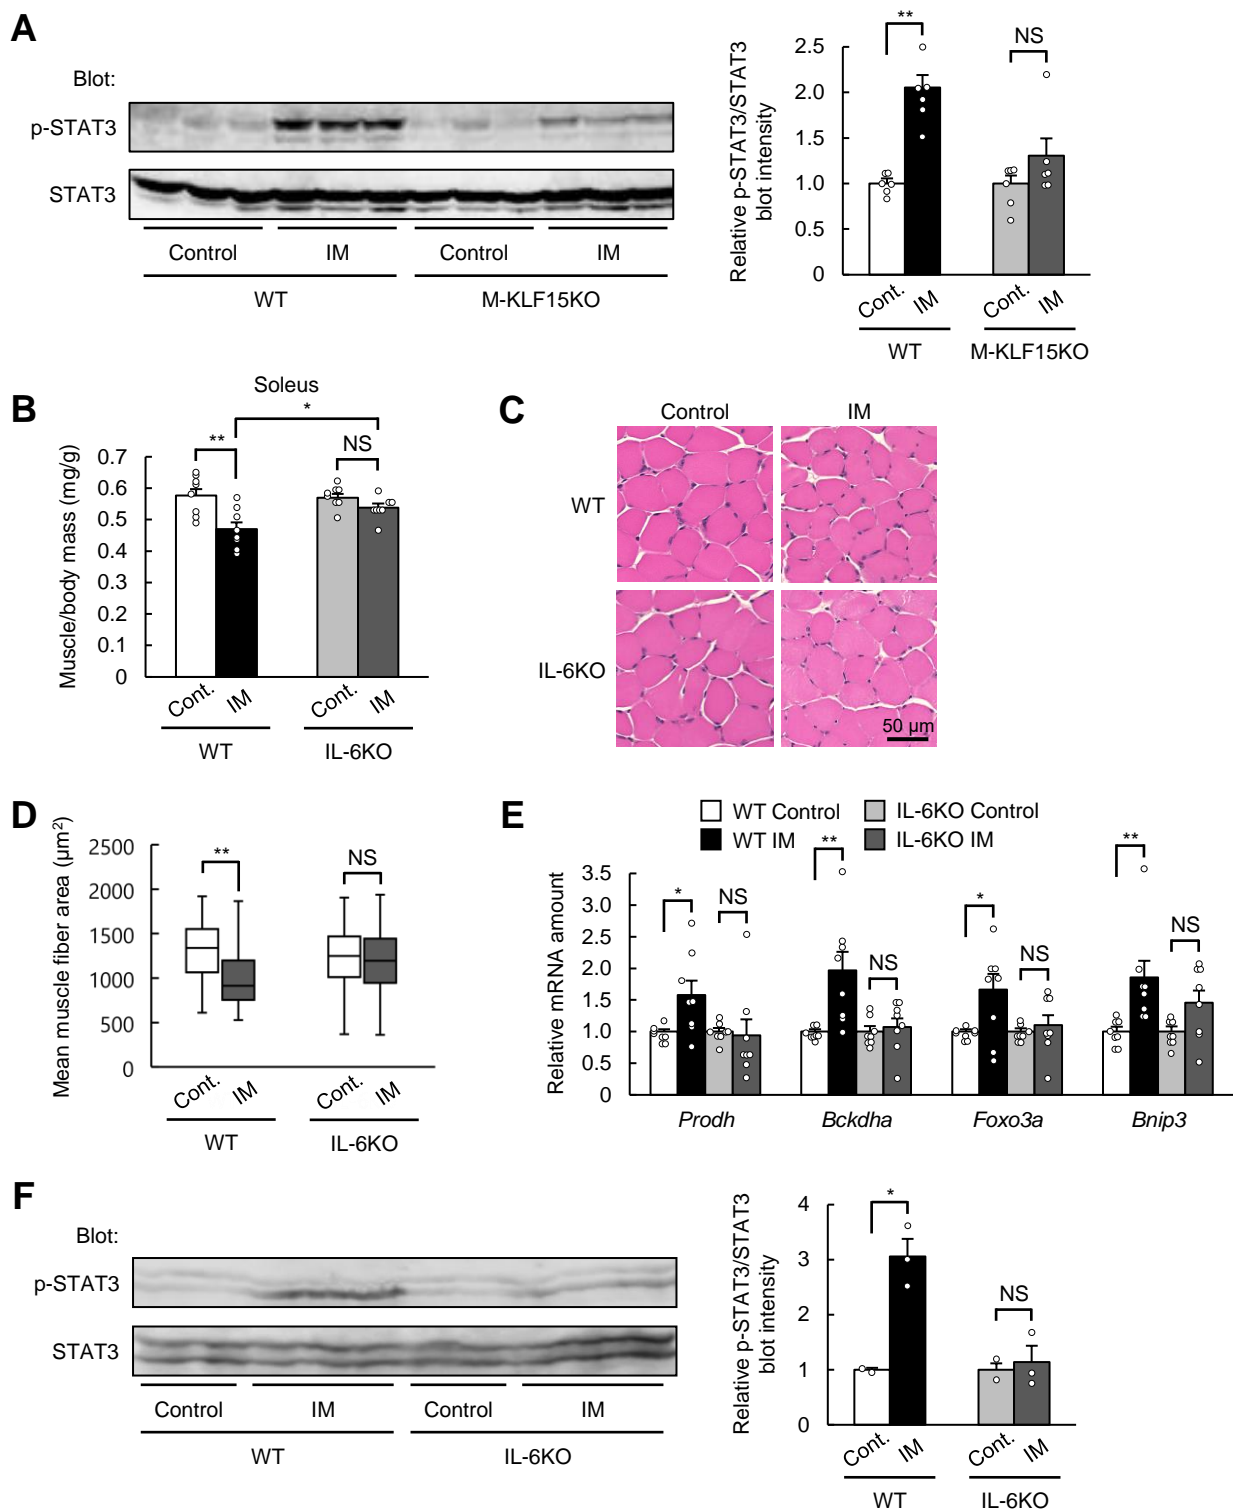

**Supplemental Figure 6. Immobilization does not induce muscle atrophy in IL-6KO mice.** **A**, Immunoblot analysis of the abundance and phosphorylation of STAT3 in gastrocnemius of WT or M-KLF15KO mice subjected to hind limb immobilization for 3 days or of corresponding control mice ( $n = 6$  mice). **B–F**, Ratio of muscle mass to body mass ( $n = 8$  mice) (**B**), histological determination of muscle fiber area in soleus (**C**, **D**), atrophy-related gene expression in gastrocnemius ( $n = 8$  mice) (**E**), and immunoblot analysis of the abundance and phosphorylation of STAT3 in gastrocnemius (control,  $n = 2$ ; IM,  $n = 3$  mice)

(**F**) for WT or IL-6KO mice subjected to hind limb immobilization for 3 days or for corresponding control mice. Scale bar in **C**, 50  $\mu\text{m}$ . The area of 800 fibers pooled from four mice was measured for each condition in **D**. Quantitative data are means  $\pm$  SEM (**A**, **B**, **E**, **F**) or medians (**D**). \* $P < 0.05$ , \*\* $P < 0.01$ , NS (two-way ANOVA with Bonferroni's post hoc test).



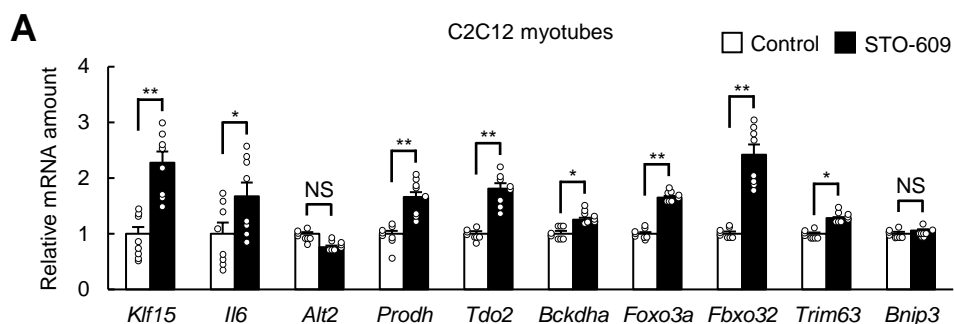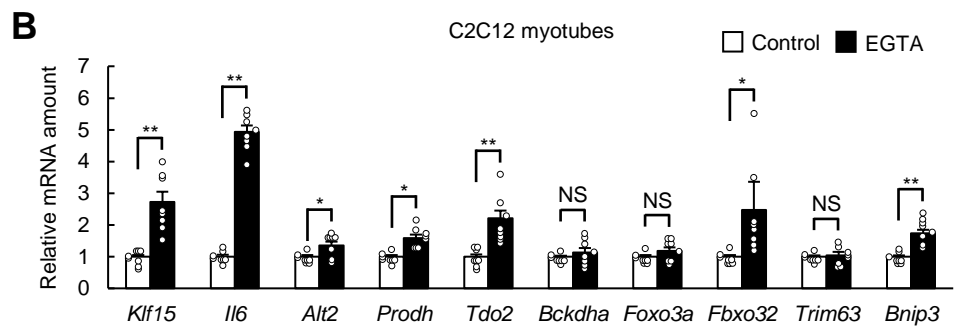

**Supplemental Figure 7. A decrease in  $[Ca^{2+}]_i$  to below the basal level is associated with muscle atrophy.** **A, B**, Quantitative RT-PCR analysis of the expression of atrophy-related genes including *Klf15* and *Il6* in C2C12 myotubes exposed to 2  $\mu$ M STO-609 or vehicle (Control) for 48 h ( $n = 8$  independent experiments) (**A**) or to 0.1 mM EGTA or vehicle (Control) for 3 h ( $n = 8$  independent experiments) (**B**). All quantitative data are means  $\pm$  SEM. \* $P < 0.05$ , \*\* $P < 0.01$ , NS (unpaired  $t$  test).

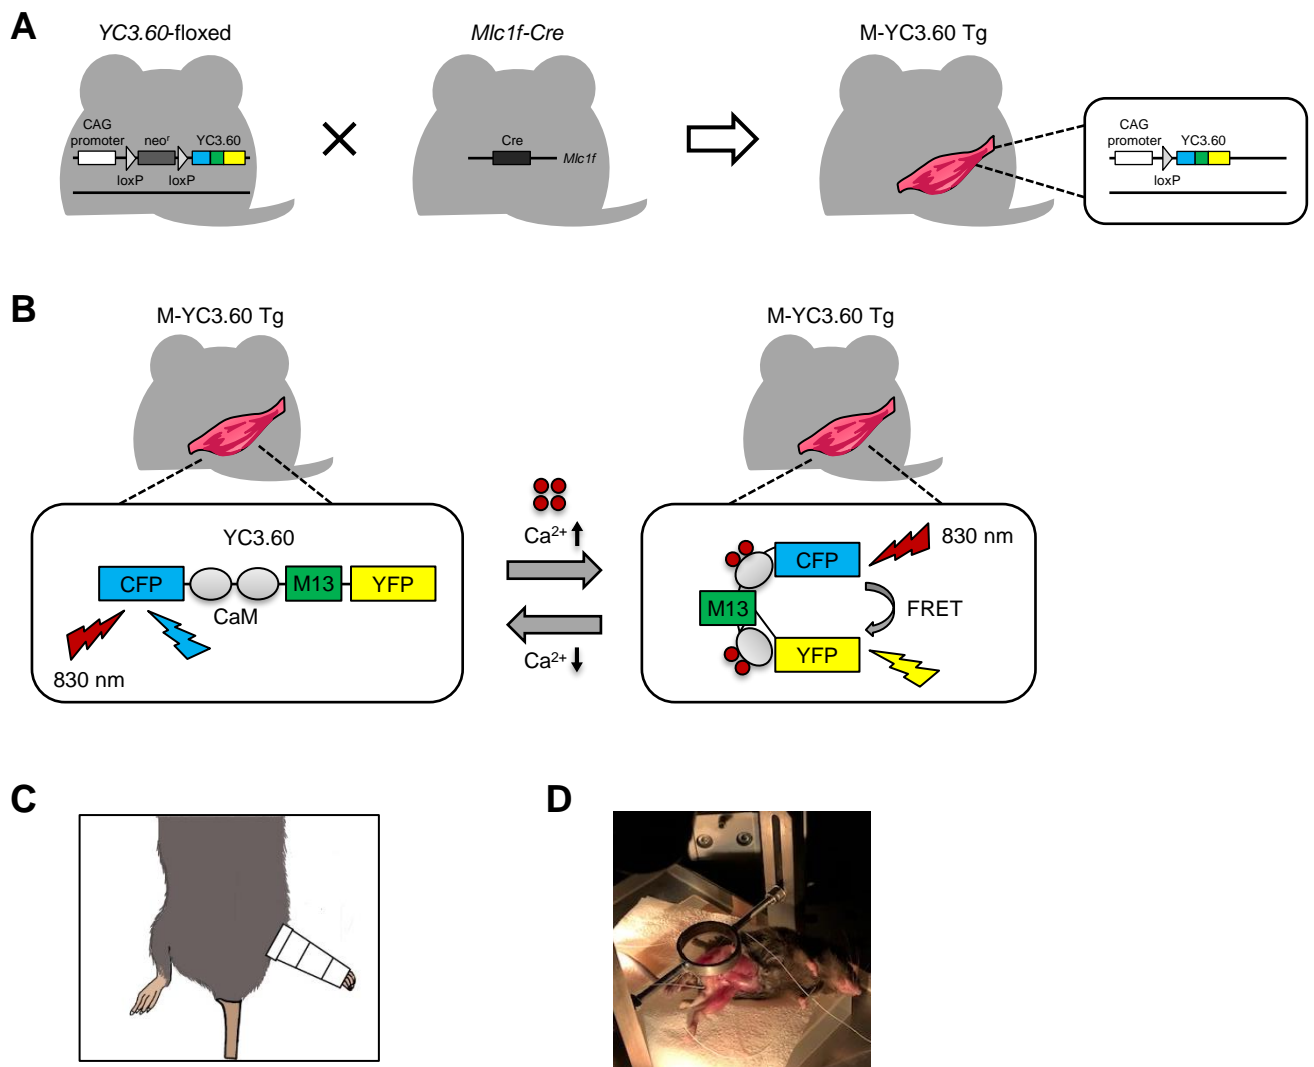

**Supplemental Figure 8. Intravital  $\text{Ca}^{2+}$  imaging of skeletal muscle-specific YC3.60 transgenic mice. A–C**, Schematic representation of the generation of M-YC3.60 Tg mice by crossing of YC3.60-floxed mice and *Mlc1f-Cre* mice (**A**), of the principle of the YC3.60 FRET sensor (**B**), and of unilateral cast immobilization of the hind limb (**C**). **D**, Photograph of the setup for two-photon microscopy.

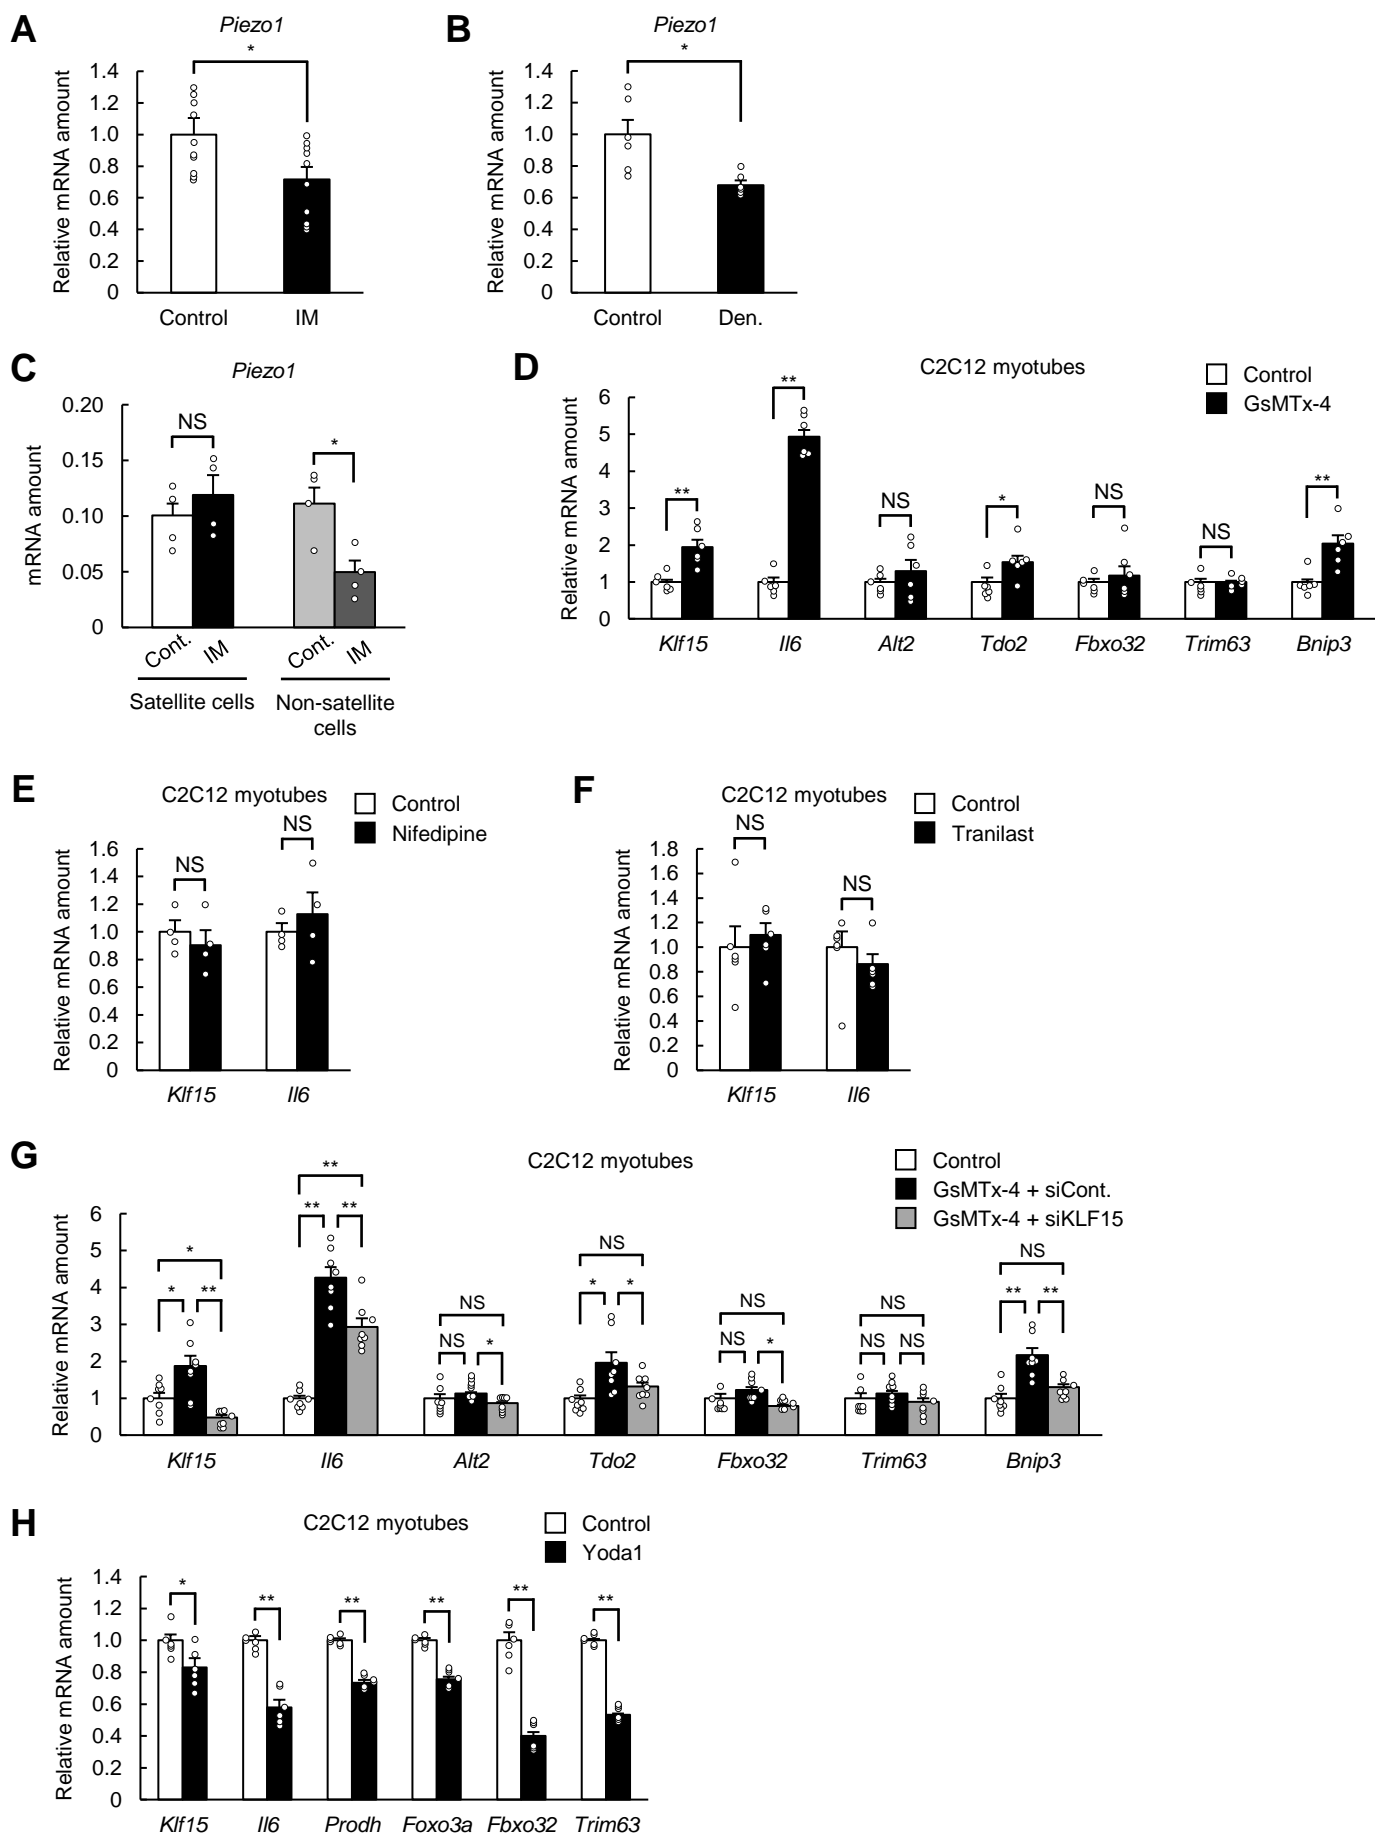

**Supplemental Figure 9. Expression of *Piezo1* in skeletal muscle of immobilized mice and effects of *Piezo1* channel inhibitor or activator.** **A, B**, Quantitative RT-PCR analysis of *Piezo1* mRNA in gastrocnemius of control or cast-immobilized mice ( $n = 10$  mice) (**A**) or of control or denervated mice ( $n = 6$  mice) (**B**). **C**, Quantitative RT-PCR analysis of *Piezo1* mRNA in the satellite cell and the non-satellite cell fractions of control or cast-immobilized mice ( $n = 4$  mice). **D**, Quantitative RT-PCR analysis of the expression of atrophy-related genes including *Klf15* and *Ilf6* in C2C12 myotubes exposed to 50  $\mu$ M GsMTx-4 or vehicle (Control) for 6 h ( $n = 6$  independent experiments). **E, F**, Quantitative RT-PCR analysis of *Klf15* and *Ilf6* mRNAs in C2C12 myotubes exposed to 10  $\mu$ M nifedipine or vehicle (Control) for 6 h ( $n = 4$  independent experiments) (**E**) or to 75  $\mu$ M tranilast or vehicle (Control) for 6 h ( $n = 6$  independent experiments) (**F**). **G**, Quantitative RT-PCR analysis of the expression of atrophy-related genes including *Klf15* and *Ilf6* in C2C12 myotubes exposed to vehicle (Control) or 50  $\mu$ M GsMTx-4 as well as transfected with control (siCont) or KLF15 (siKLF15) siRNAs for 6 h ( $n = 8$  independent experiments). **H**, Quantitative RT-PCR analysis of the expression of atrophy-related genes including *Klf15* and *Ilf6* in C2C12 myotubes exposed to 50  $\mu$ M Yoda1 or vehicle (Control) for 6 h ( $n = 6$  independent experiments). All quantitative data are means  $\pm$  SEM. \* $P < 0.05$ , \*\* $P < 0.01$ , NS by the unpaired  $t$  test (**A, B, D–F, H**) or two-way ANOVA with Bonferroni's post hoc test (**C, G**).

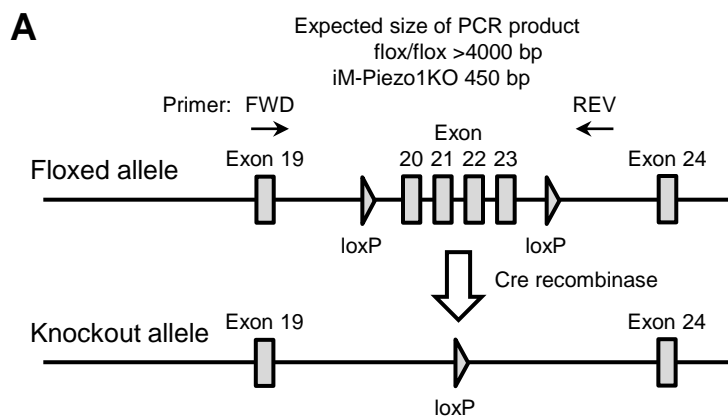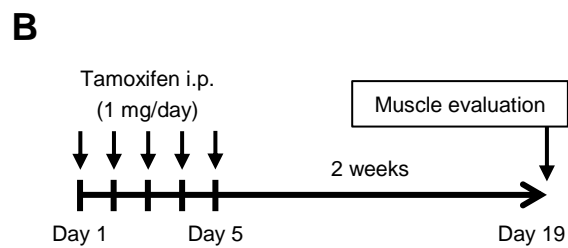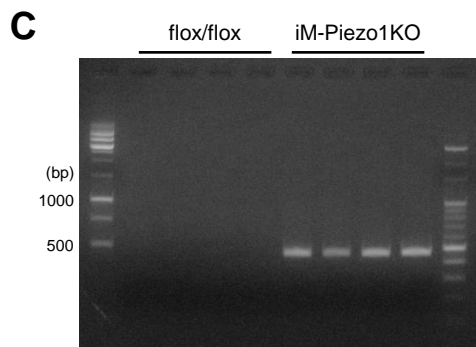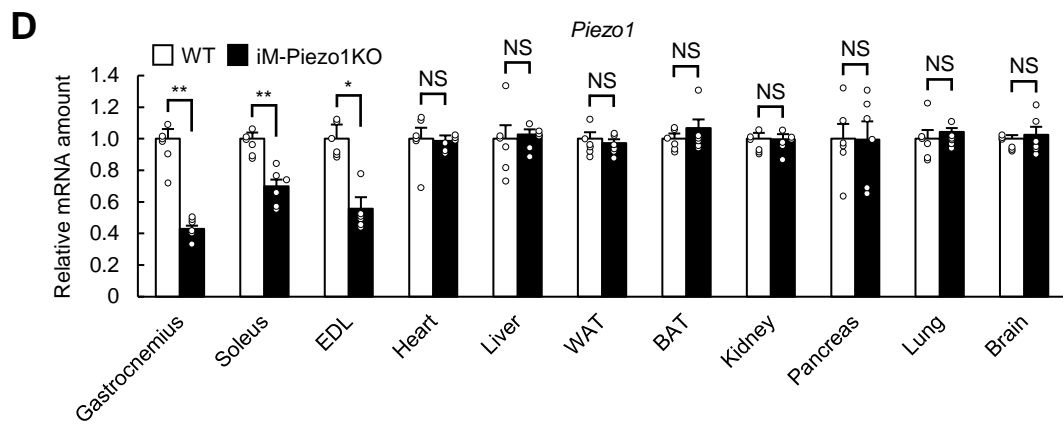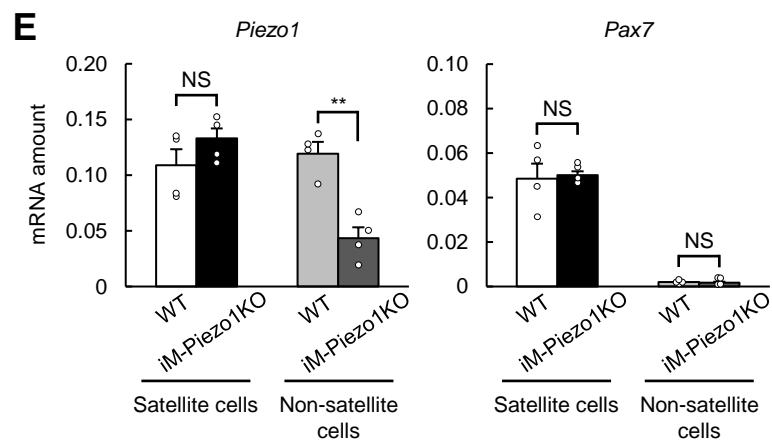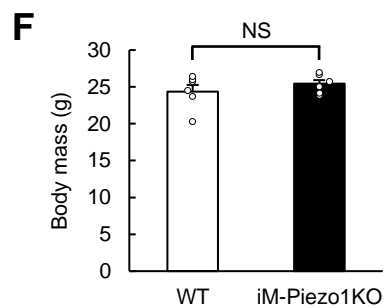

**Supplemental Figure 10. Generation of tamoxifen-inducible skeletal muscle-specific Piezo1 KO (iM-Piezo1KO) mice.** **A, B**, Schematic representation of the floxed and KO alleles of mouse *Piezo1* showing the positions of PCR primers (**A**) as well as of the protocol for intraperitoneal (i.p.) injection of tamoxifen and muscle evaluation in iM-Piezo1KO mice (**B**). **C**, Gel electrophoresis of PCR products for genomic DNA isolated from gastrocnemius of WT (flox/flox) or iM-Piezo1KO mice at 2 weeks after intraperitoneal injection of tamoxifen ( $n = 4$  mice). The outer lanes contain molecular size markers. **D**, Quantitative RT-PCR analysis of the tissue distribution of *Piezo1* mRNA in WT or iM-Piezo1KO mice at 2 weeks after intraperitoneal injection of tamoxifen ( $n = 6$  mice). EDL, extensor digitorum longus; WAT and BAT, white and brown adipose tissue, respectively. **E**, Quantitative RT-PCR analysis of *Piezo1* and *Pax7* mRNAs in the satellite cell and the non-satellite cell fractions of WT or iM-Piezo1KO mice at 2 weeks after intraperitoneal injection of tamoxifen ( $n = 4$  mice). **F**, Body mass of WT and iM-Piezo1KO mice at 2 weeks after intraperitoneal injection of tamoxifen ( $n = 6$  mice). All quantitative data are means  $\pm$  SEM. \* $P < 0.05$ , \*\* $P < 0.01$ , NS by the unpaired  $t$  test (**D, F**) or two-way ANOVA with Bonferroni's post hoc test (**E**).

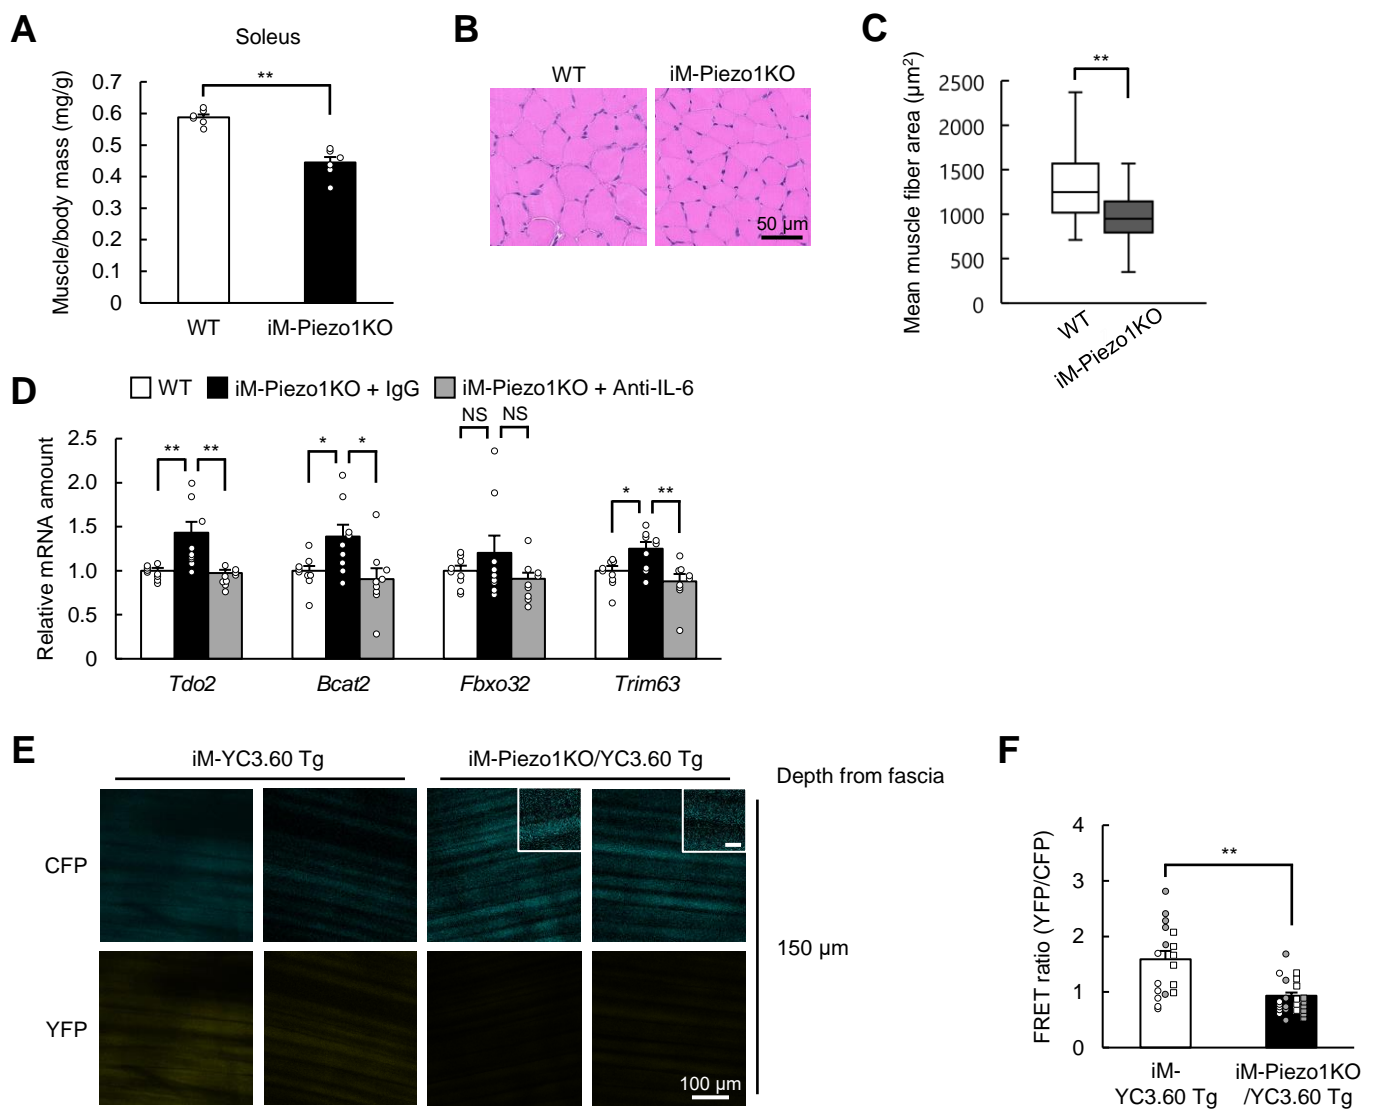

**Supplemental Figure 11. The phenotype of iM-Piezo1KO mice.** **A–C**, Ratio of soleus muscle mass to body mass ( $n = 6$  mice) (**A**), and histological determination of muscle fiber area in soleus (**B**, **C**) for WT or tamoxifen-treated iM-Piezo1KO mice. The area of 800 fibers pooled from four mice was measured for each condition in **C**. Scale bars, 50  $\mu$ m. **D**, Quantitative RT-PCR analysis of the expression of atrophy-related genes in gastrocnemius of WT or iM-Piezo1KO mice subjected to intraperitoneal injection of neutralizing antibodies to IL-6 (0.1 mg/body) or control IgG at the onset of tamoxifen treatment ( $n = 9$  mice). **E**, **F**, Intravital  $\text{Ca}^{2+}$  imaging of iM-Piezo1KO/YC3.60 Tg mice. Representative two-photon images of CFP and YFP fluorescence at a depth of 150  $\mu$ m from the fascia of the tibialis anterior muscle for tamoxifen-treated iM-YC3.60 Tg mice or iM-Piezo1KO/YC3.60 Tg mice are shown in **E**. Scale bars, 100  $\mu$ m (main panels) or 20  $\mu$ m (insets). Quantitation of the FRET ratio in areas of six fibers for each of three (iM-YC3.60 Tg) or four (iM-Piezo1KO/YC3.60 Tg) hind limbs is shown in **F**, with white or gray circles or squares indicating the values obtained from individual hind limbs. Quantitative data are means  $\pm$  SEM (**A**, **D**, **F**) or medians (**C**). \* $P < 0.05$ , \*\* $P < 0.01$ , NS by the unpaired  $t$  test (**A**, **C**, **F**) or two-way ANOVA with Bonferroni's post hoc test (**D**).

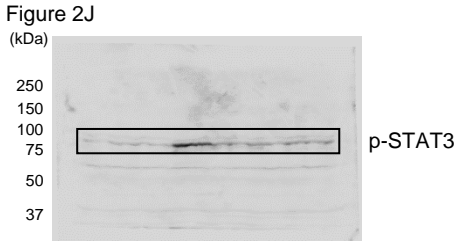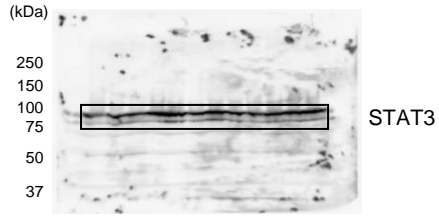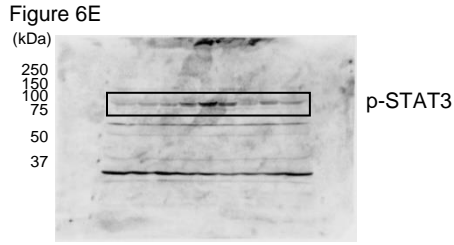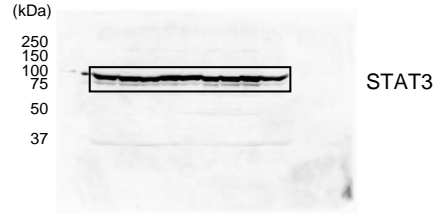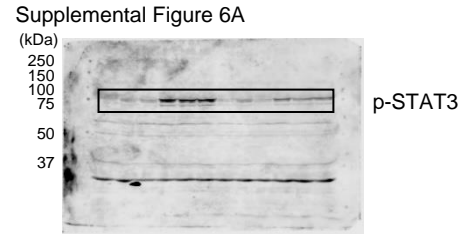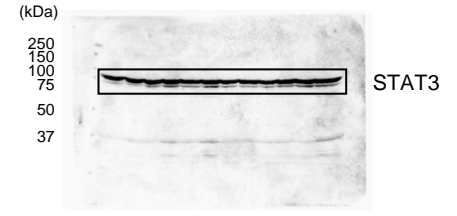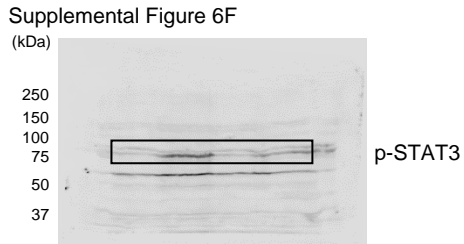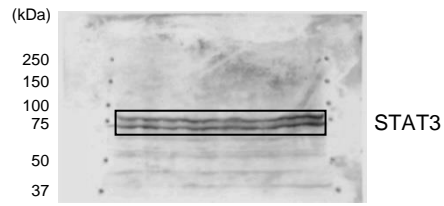

**Supplemental Figure 12. Uncropped immunoblot images.** Black boxes contain the areas shown in the indicated figures.



| Characteristic                       | Control group | IM group      | <i>P</i> value |
|--------------------------------------|---------------|---------------|----------------|
| N                                    | 18            | 15            |                |
| Age (years)                          | 63.9 ± 15.0   | 69.1 ± 11.7   | 0.29           |
| Sex (male/female)                    | 6/12          | 5/10          | 1.00           |
| Body mass index (kg/m <sup>2</sup> ) | 23.3 ± 4.2    | 24.1 ± 5.1    | 0.63           |
| Duration of immobilization (days)    |               | 8.3 ± 3.1     |                |
| Site of biopsy (upper/lower limb)    | 10/8          | 8/7           | 0.90           |
| Serum creatinine (mg/dl)             | 0.80 ± 0.15   | 1.44 ± 2.22   | 0.25           |
| Serum creatine kinase (U/l)          | 126.3 ± 58.0  | 183.5 ± 288.6 | 0.46           |
| Hemoglobin A <sub>1c</sub> (%)       | 5.8 ± 0.6     | 6.1 ± 0.9     | 0.44           |

**Supplemental Table 1. Clinical characteristics of control and immobilized human subjects.** Data for continuous variables are means ± SD. The *P* values were determined with the chi-square test (sex distribution and site of biopsy) or unpaired *t* test (other parameters).

| Mouse gene    | Primers (5' → 3')                                             |
|---------------|---------------------------------------------------------------|
| <i>36b4</i>   | FWD: GAGGAATCAGATGAGGATATGGGA<br>REV: AAGCAGGCTGACTTGTTGC     |
| <i>Adgre1</i> | FWD: TGCCTCCCTGACTTTCAAAT<br>REV: TGGCATTGCTGTATCTGCTC        |
| <i>Alt2</i>   | FWD: CAGACCCAGACAACATTTACCTG<br>REV: CGCGGAGTACAAGGGATACTG    |
| <i>Bcat2</i>  | FWD: TGGAGTGAATAACAAGGCTG<br>REV: GTCTCCACCTTTGTATGCTTTC      |
| <i>Bckdha</i> | FWD: GCAGCCTATGCTGCCAAGC<br>REV: GATGGCATAGCCATTGTTCCG        |
| <i>Bnip3</i>  | FWD: TTCCACTAGCACCTTCTGATGA<br>REV: GAACACCGCATTACAGAACAA     |
| <i>Fbxo32</i> | FWD: GCAAACACTGCCACATTCTCTC<br>REV: CTTGAGGGGAAAGTGAGACG      |
| <i>Foxo3a</i> | FWD: CAGGCTCCTCACTGTATTCACTA<br>REV: CATTGAACATGTCCAGGTCCAA   |
| <i>Il1b</i>   | FWD: GCTGAAAGCTCTCCACCTCA<br>REV: AGGCCACAGGTATTTTGTCG        |
| <i>Il6</i>    | FWD: CAAAGCCAGAGTCCTTCAGAG<br>REV: GCCACTCCTTCTGTGACTCC       |
| <i>Klf15</i>  | FWD: ACCGAAATGCTCAGTGGGTACCTA<br>REV: GGAACAGAAGGCTTGCGAGTCA  |
| <i>Mcp1</i>   | FWD: AGGTGTCCCAAAGAAGCTGTA<br>REV: ATGTCTGGACCCATTCTTCT       |
| <i>Piezo1</i> | FWD: ATCCTGCTGTATGGGCTGAC<br>REV: AAGGGTAGCGTGTGTGTTCC        |
| <i>Prodh</i>  | FWD: TCATCAGTGCCCGCACCTAC<br>REV: TGCAGTGAGCTTAATGGCTGAGA     |
| <i>Tdo2</i>   | FWD: TGCTCAAGGTGATAGCTCGGA<br>REV: AGGAGCTTGAAGATGACCACCA     |
| <i>Tnfa</i>   | FWD: CATCTTCTCAAATTCGAGTGACAA<br>REV: TGGGAGTAGACAAGGTACAACCC |
| <i>Trim63</i> | FWD: GCTGGTGGAAAACATCATTGACAT<br>REV: CATCGGGTGGCTGCCTTT      |

**Supplemental Table 2. Sequences of mouse primers for quantitative RT-PCR analysis.**  
FWD, forward; REV, reverse.

| Human gene    | Primers (5' → 3')                                           |
|---------------|-------------------------------------------------------------|
| <i>36B4</i>   | FWD: TTGTGGGAGCAGACAATGTG<br>REV: TATTGGCCAGCAACATGTCC      |
| <i>BCAT2</i>  | FWD: TCATCGAAGTGGACAAGGAC<br>REV: TAACTTGTAGTTGCCGACCC      |
| <i>BNIP3</i>  | FWD: CTGAAACAGATACCCATAGCATT<br>REV: CCGACTTGACCAATCCCA     |
| <i>FBXO32</i> | FWD: AAGTCTGTGCTGGTCGGGAA<br>REV: AGTGAAGGTGAGGCCTTTGAAG    |
| <i>FOXO3A</i> | FWD: TTCAAGGATAAGGGCGACAGCAAC<br>REV: CTGCCAGGCCACTTGGAGAG  |
| <i>IL6</i>    | FWD: GGTACATCCTCGACGGCATCT<br>REV: GTGCCTCTTTGCTGCTTTCAC    |
| <i>KLF15</i>  | FWD: CAAAAGCAGCCACCTCAAG<br>REV: TCTTCTCGCACACAGGACAC       |
| <i>PIEZO1</i> | FWD: CAATGAGGAGGCCGACTACC<br>REV: GCACTCCTGCAGCTCGATGA      |
| <i>PRODH</i>  | FWD: GTGTACAAGTACGTGCCCTATGG<br>REV: TCATGAGGCTGCTGTTCTCCAG |
| <i>TDO2</i>   | FWD: GGTCCTCAGGCTATCACTACC<br>REV: CAGTGTCGGGGAATCAGGT      |
| <i>TRIM63</i> | FWD: GGAGCCACCTTCTCTTGAC<br>REV: GTCAATGGCTCTCAGGGCGT       |

**Supplemental Table 3. Sequences of human primers for quantitative RT-PCR analysis.**  
FWD, forward; REV, reverse.
